# Supplementary material for: Critical requirement of SOS1 for tumor development and microenvironment modulation in KRASG12D-driven lung adenocarcinoma
Source: PubMed Central journal article supplement (PMC10511506; doi:10.1038/s41467-023-41583-1), 2023-09-20
Supplement: 41467_2023_41583_MOESM1_ESM.pdf [file 41467_2023_41583_MOESM1_ESM.pdf]

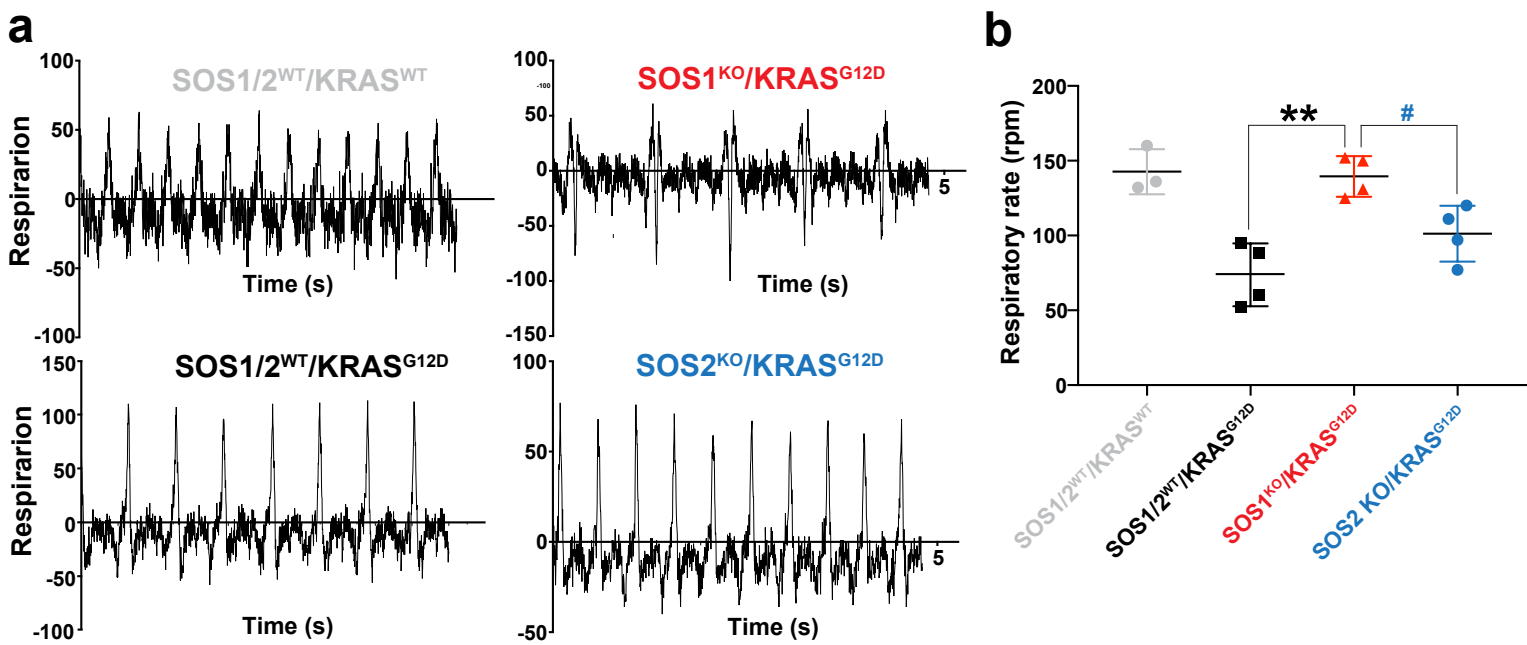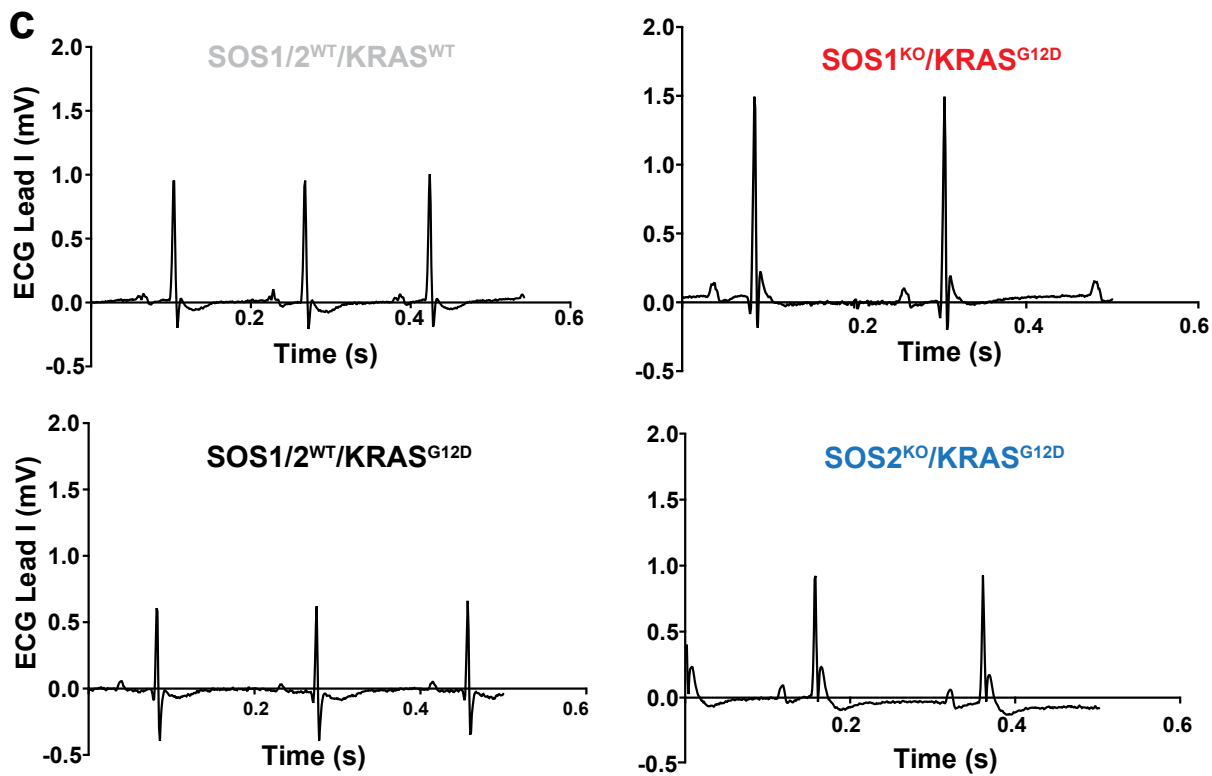

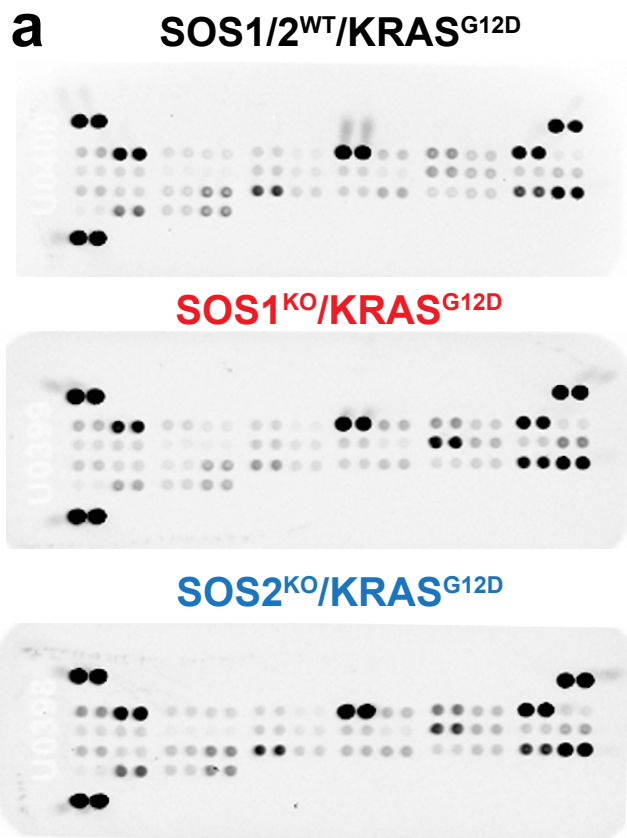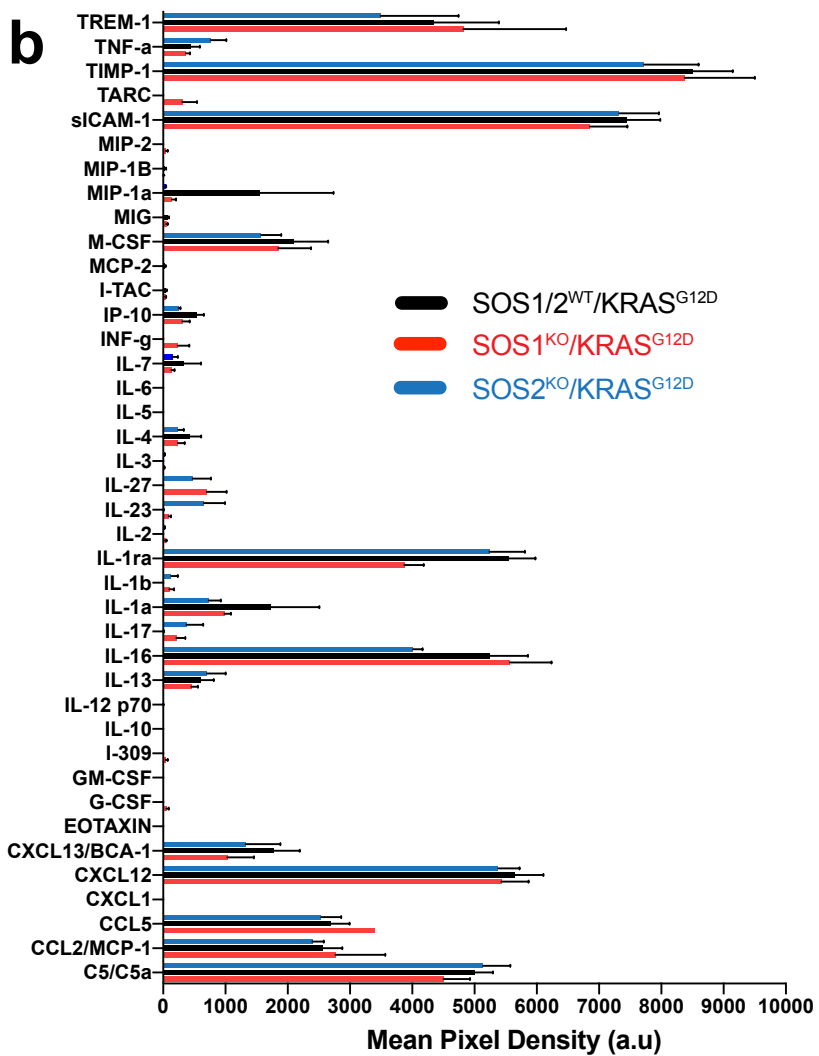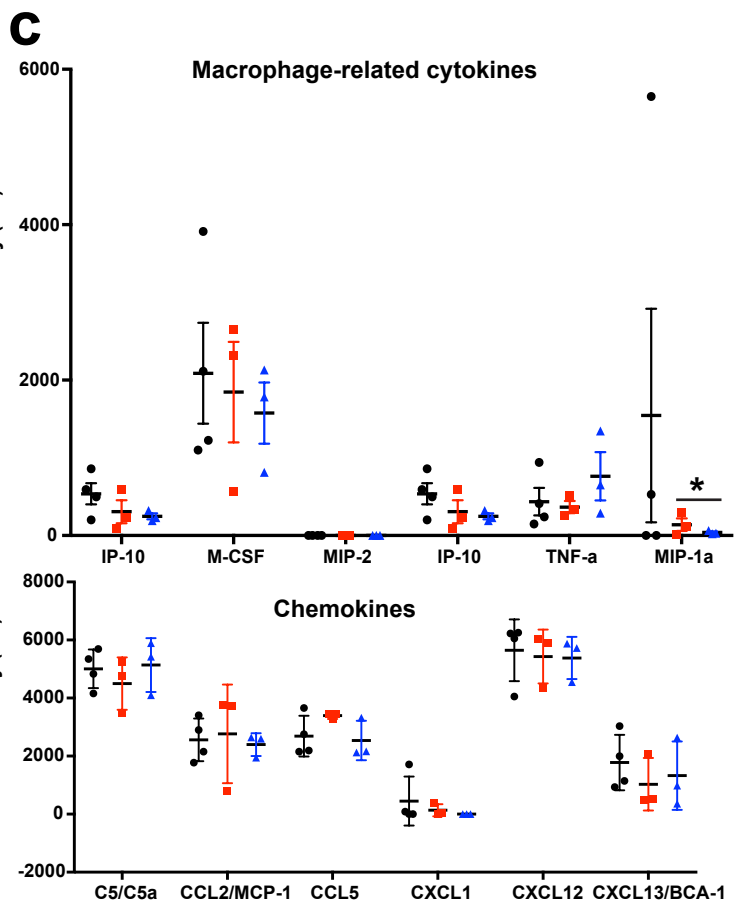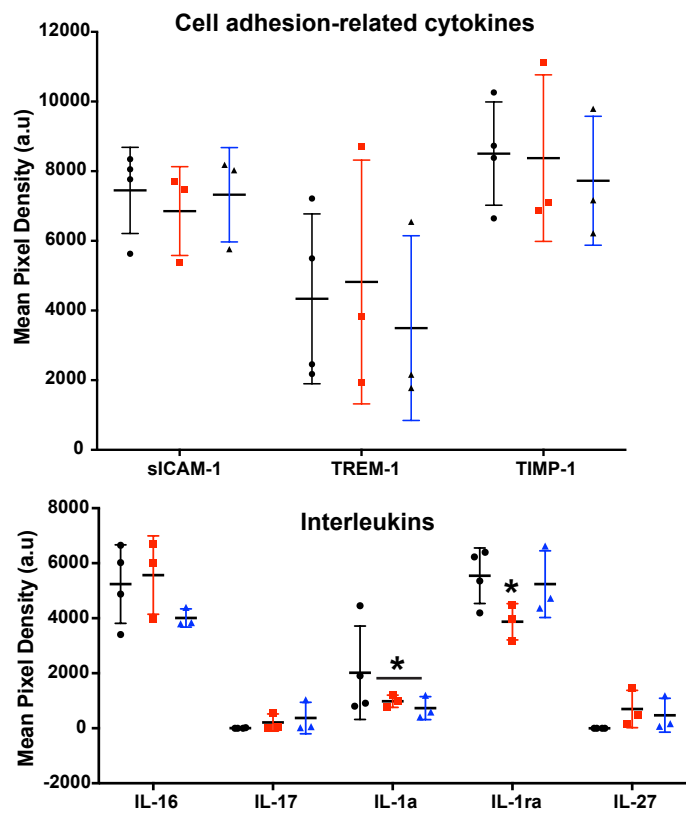

**Supplementary Figure S1. SOS1 depletion rescues LUAD-related pathophysiological parameters in KRAS<sup>G12D</sup> mutated mice.**

**a-b**, Representative respiratory profiles (**a**) and derived, color-coded graph plot (**b**) illustrating the respiratory rate in surviving, 12-month-old SOS1/2<sup>WT</sup>/KRAS<sup>WT</sup>, SOS1/2<sup>WT</sup>/KRAS<sup>G12D</sup>, SOS1<sup>KO</sup>/KRAS<sup>G12D</sup> and SOS2<sup>KO</sup>/KRAS<sup>G12D</sup> mice. Data expressed as mean ± SD. \*\**P*=0.0012 and #*P*=0.0439 vs SOS1<sup>KO</sup>/KRAS<sup>G12D</sup>. One-way ANOVA and Tukey's test. *n*=3 independent mice for SOS1/2<sup>WT</sup>/KRAS<sup>WT</sup> mice and *n*=4 independent mice for the rest of experimental groups. **c** Representative electrocardiogram (ECG) lead I recordings from 12-month-old mice of the indicated genotypes (SOS1/2<sup>WT</sup>/KRAS<sup>WT</sup>, SOS1/2<sup>WT</sup>/KRAS<sup>G12D</sup>, SOS1<sup>KO</sup>/KRAS<sup>G12D</sup> and SOS2<sup>KO</sup>/KRAS<sup>G12D</sup>). Source data are provided as a Source Data file.

**Supplementary Figure S2. Impact of SOS1/2 ablation on pulmonary levels of cytokines and chemokines.**

**a** Representative image of membrane arrays used for profiling 40 distinct cytokines and chemokines in lung tumor samples from KRAS<sup>G12D</sup>-mutated, SOS1/2<sup>WT</sup>, SOS1<sup>KO</sup> and SOS2<sup>KO</sup> mice. **b** Bar chart showing quantitation of the 40 molecular parameters of interest in each of the three color-coded experimental groups. **c**, Bar charts showing detailed quantitations grouped by specific families of cytokines and chemokines. Data shown as mean ± SD. *n*=3 independent samples per genotype. For MIP-1 (\**P*=0.0488 vs SOS1<sup>KO</sup> and \**P*=0.0431 vs SOS2<sup>KO</sup>). For IL-1ra (\**P*=0.0234) vs SOS1/2<sup>WT</sup>. One-way ANOVA and Tukey's test. C5a: Complement component 5a; CCL: C-C Motif Chemokine Ligand; CXCL: C-X-C motif chemokine; sICAM: Soluble intercellular adhesion molecule; IL: Interleukin; IP: Interferon-γ-Inducible Protein; MCP: Monocyte chemoattractant protein; M-CSF: Macrophage Colony stimulating factor; MIP: Macrophage Inflammatory Proteins; TIMP: TIMP Metalloproteinase Inhibitor; TNF: Tumor Necrosis Factor. TREM-1: triggering receptor expressed on myeloid cells. Source data are provided as a Source Data file.
